# Supplementary material
Source: MDPI journal article supplement (https://www.mdpi.com/2073-4441/15/17/3122)
Supplement: s1 [file s1 › water-2538902-supplementary.pdf]

## Supplementary Materials

**Table S1.** Correlation coefficient based on different reaction orders.

| Reaction order | 0        | 0.5      | 0.958799 | 1       | 1.5      | 2        | 3       |
|----------------|----------|----------|----------|---------|----------|----------|---------|
| Adj. R-Square  | 0.885143 | 0.959459 | 0.988772 | 0.97832 | 0.950023 | 0.875146 | 0.73322 |

An application of excel gauge solution based on the mode of linear programming was used to optimize reaction orders. The optimized order was 0.958799, and the correlation coefficient at this order was 0.988772. The reaction order was round up to 1 in this study.

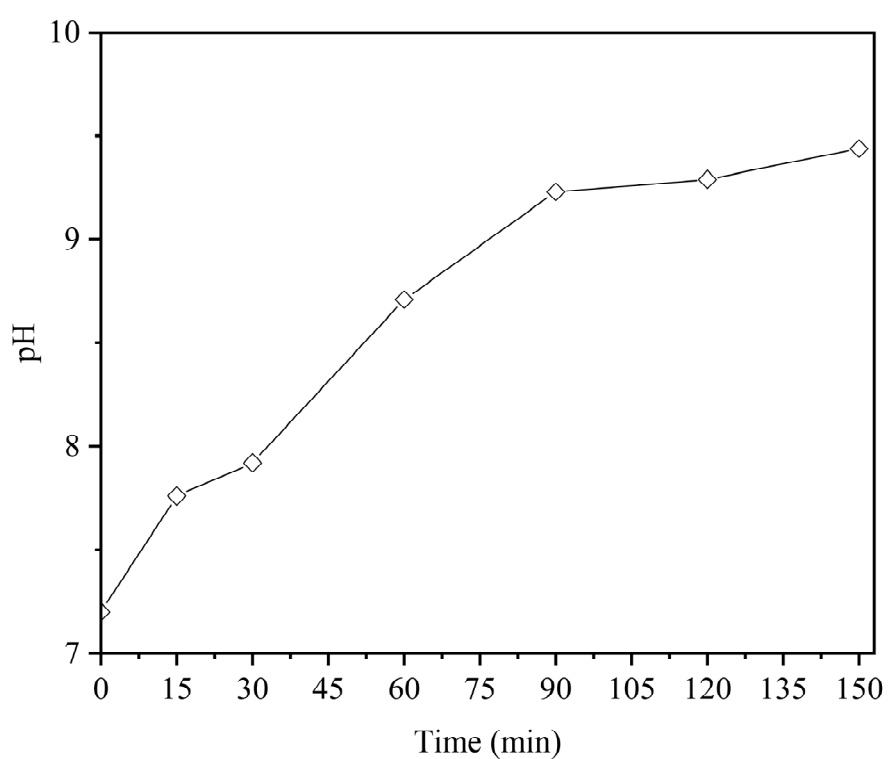

**Figure S1.** Variations of pH with respect to time.

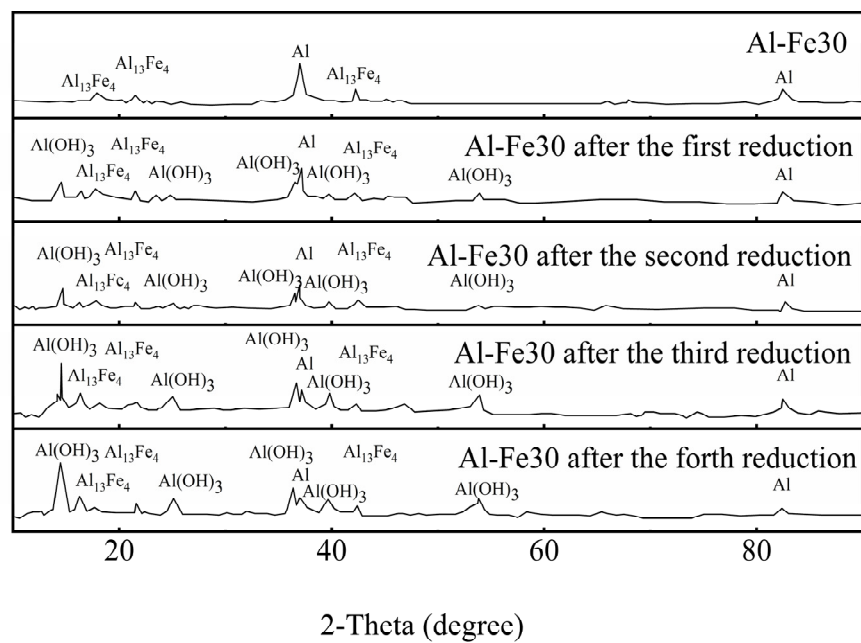

**Figure S2.** XRD patterns of different Al-Fe alloys.
